# Supplementary material for: Effects of food type and abundance on begging and sharing in Asian small-clawed otters (Aonyx cinereus)
Source: PeerJ. 2020 Nov 30;8:e10369. doi: 10.7717/peerj.10369 (PMC7713600; doi:10.7717/peerj.10369)
Supplement: Supplemental Information 1 [file peerj-08-10369-s001.xlsx]

## Sheet: Sheet1
Name	Age	Sex	Parent	Relation	Zoo
Leah	10	F	y	Mother	T
Feet	9	M	y	Father	T
India	5	F	n	Offspring	T
Chai	5	M	n	Offspring	T
Cassia	3	M	n	Offspring	T
Cameron	3	M	n	Offspring	T
Hazel	1	F	n	Offspring	T
Daisy	1	F	n	Offspring	T
Harry	1	M	n	Offspring	T
Dougie	1	M	n	Offspring	T
Rani	0.5	F	n	Offspring	T
Kahn	0.5	M	n	Offspring	T
Name	Age	Sex	Parent	Relation	Zoo
Tope	9	M	y	Father	N
Jam	7	F	y	Mother	N
Pod	4	F	n	Offspring	N
Meg	1	F	n	Offspring	N
Rosie	0.3	F	n	Offspring	N
Dot	0.3	F	n	Offspring	N
Charlie	0.3	M	n	Offspring	N
Pepe	0.3	M	n	Offspring	N
